# Supplementary figures and images for: In Vivo Positron Emission Tomography Imaging of Protease Activity by Generation of a Hydrophobic Product from a Noninhibitory Protease Substrate
Source: Oxford University Press journal article supplement (doi:10.1158/1078-0432.ccr-11-0608), 2011-10-21

Supplementary Figure 3.

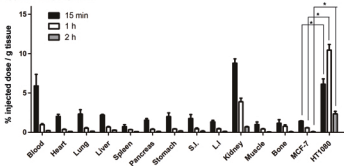

Supplement: 10780432ccr110608-sup-f3_pdf_1_3mb.pdf [file 10780432ccr110608-sup-f3_pdf_1_3mb.pdf]
